# Supplementary material for: Patient Enrichment for Precision‐Based Cancer Clinical Trials: Using Prospective Cohort Surveillance as an Approach to Improve Clinical Trials
Source: PubMed Central journal article supplement — Clin Pharmacol Ther. 2018 Mar 23;104(1):23–6. doi: 10.1002/cpt.1051 (PMC6032821; doi:10.1002/cpt.1051), 2018-03-23

# Total Cancer Care Protocol: A Partnership with Patients

Total Cancer Care<sup>®</sup> aims to:

- Identify the needs of the patient & their families
- Develop an evidence-based approach to meet those needs
- Develop markers to predict need so they can be anticipated

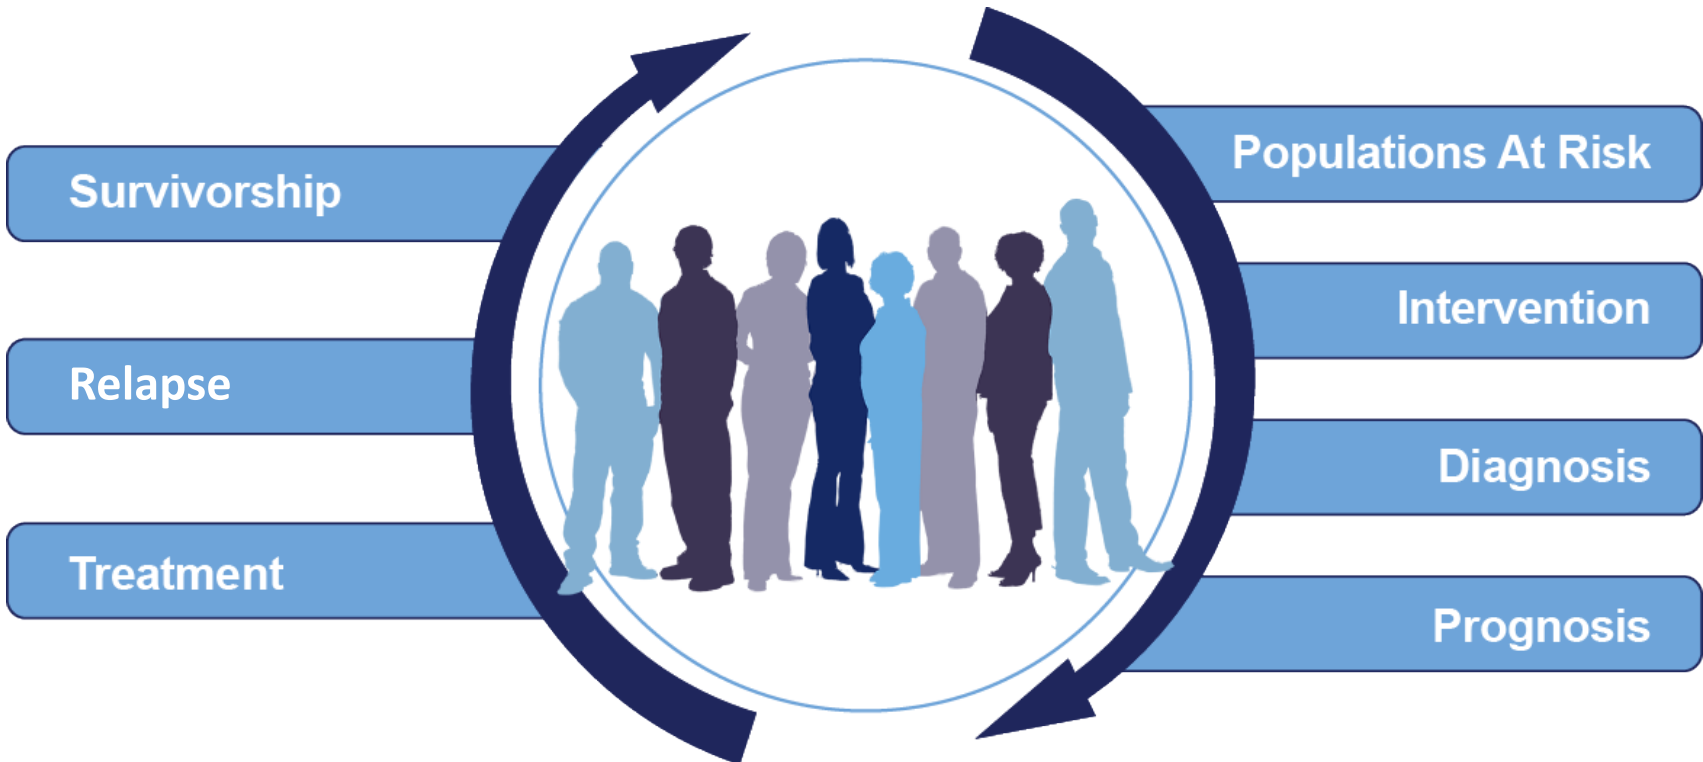

Supplement: CPT-104-23-s002.pdf [file CPT-104-23-s002.pdf]
