# Supplementary figures and images for: Patient Enrichment for Precision‐Based Cancer Clinical Trials: Using Prospective Cohort Surveillance as an Approach to Improve Clinical Trials
Source: PubMed Central journal article supplement — Clin Pharmacol Ther. 2018 Mar 23;104(1):23–6. doi: 10.1002/cpt.1051 (PMC6032821; doi:10.1002/cpt.1051), 2018-03-23

# ORIEN Governance Structure: A Self-Governed Alliance of Cancer Centers

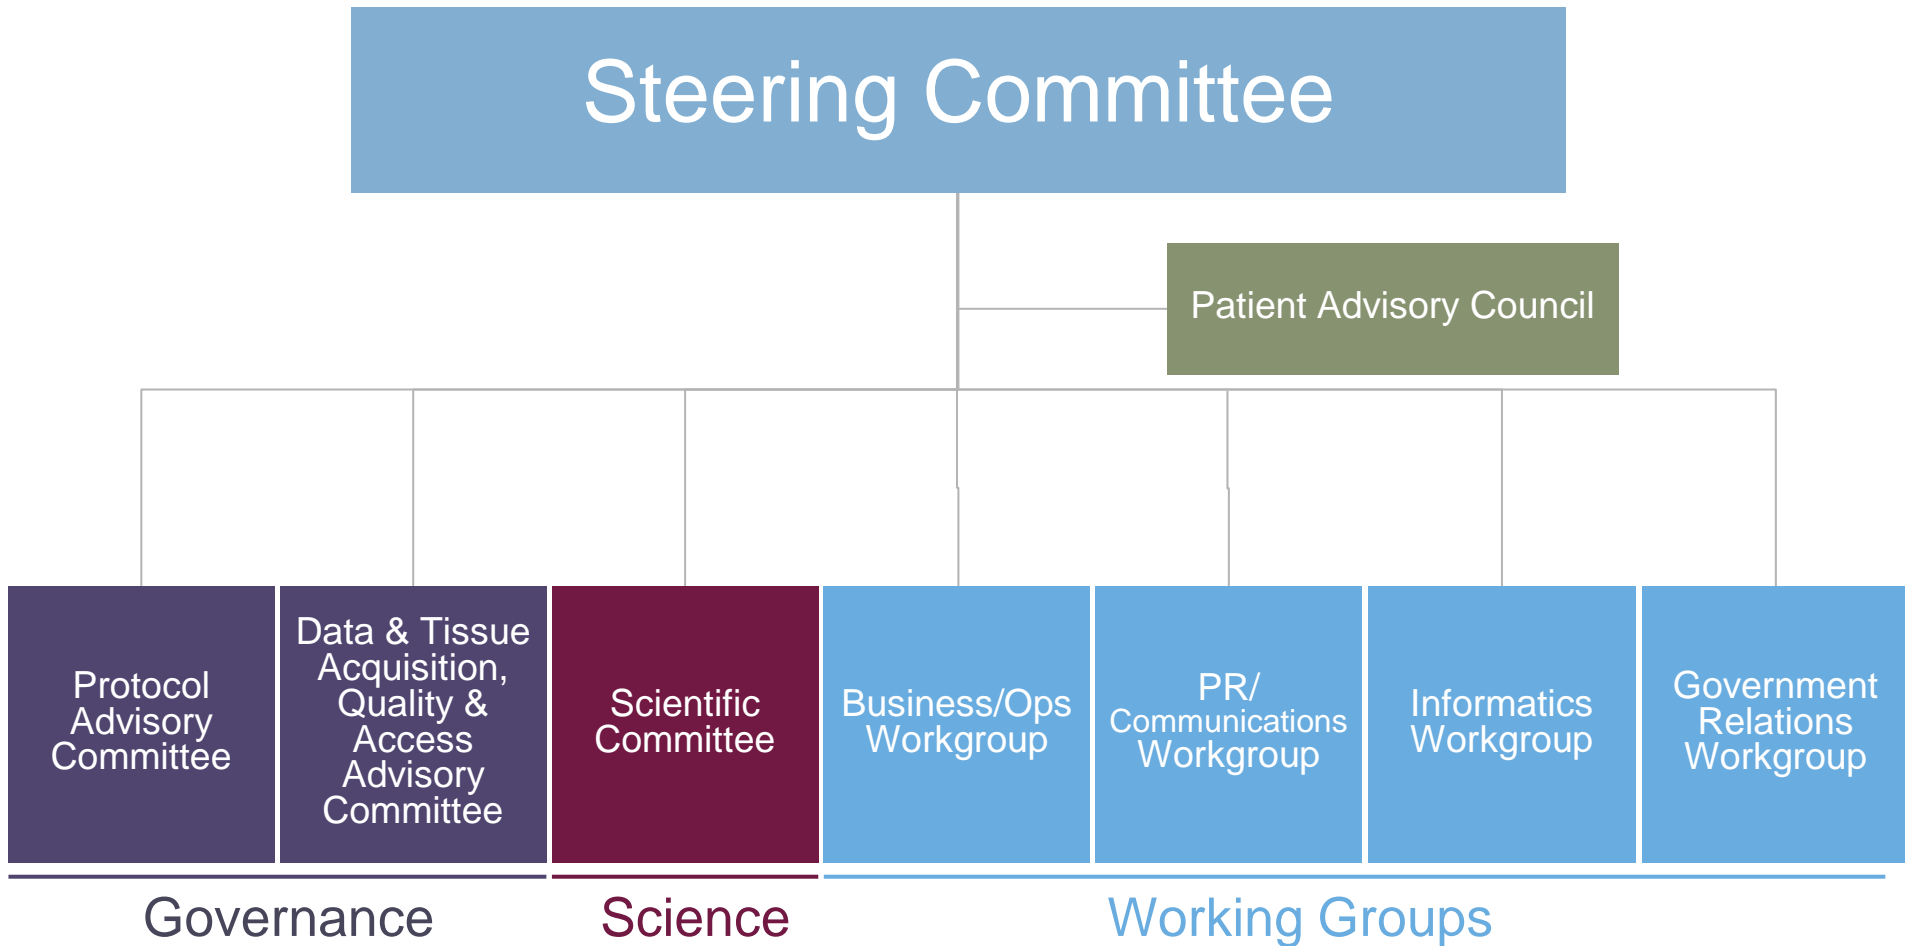

Supplement: CPT-104-23-s003.pdf [file CPT-104-23-s003.pdf]
